# Supplementary material for: Improved tribological and thermal properties of lubricants by graphene based nano-additives
Source: Royal Society of Chemistry journal article supplement (doi:10.1039/c6ra12029f), 2016-01-01
Supplement: c6ra12029f1.pdf [file c6ra12029f1.pdf]

## Improved Tribological and Thermal Properties of Lubricants by Graphene Based Nano-additive

Received 00th January 20xx,  
Accepted 00th January 20xx

V. Zin,<sup>a</sup> S. Barison,<sup>a\*</sup> F. Agresti,<sup>a</sup> L. Colla,<sup>b</sup> C. Pagura<sup>a</sup> and M. Fabrizio<sup>a</sup>

DOI: 10.1039/x0xx00000x

www.rsc.org/

### SUPPLEMENTARY INFORMATION

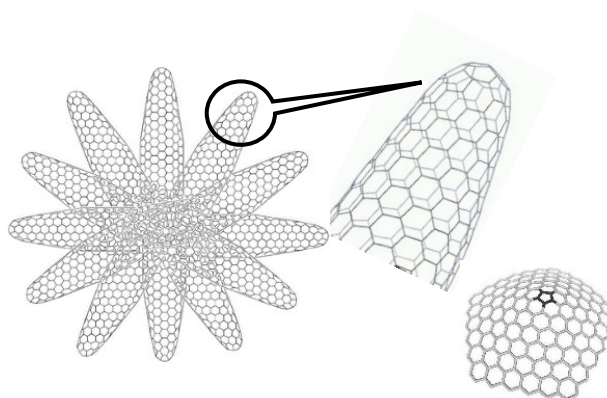

Figure S1. Schematic reproduction of the nanohorns structure.

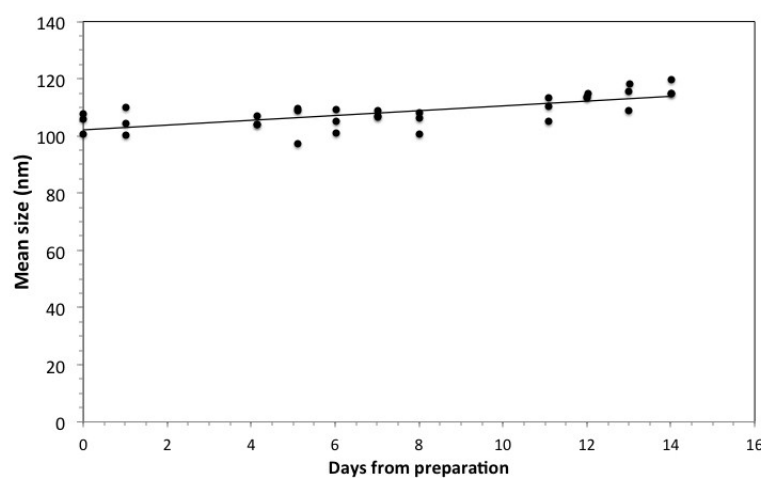

Figure S2. Mean aggregate size measured by DLS for 15 days in PAG+0.1%<sub>wt</sub> CNHs

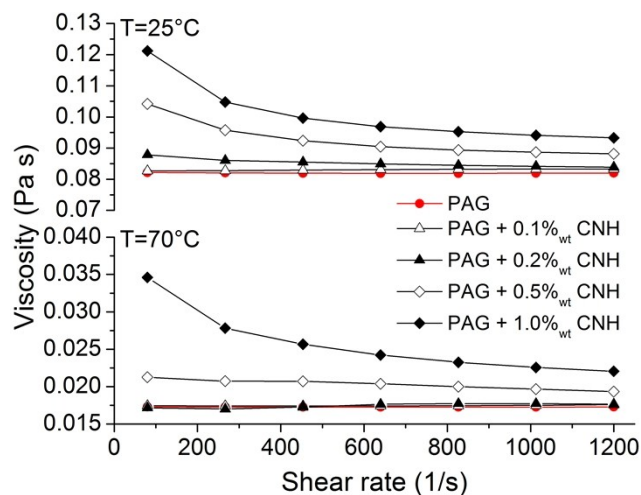

Figure S3. Correlation between viscosity and shear rate.

| Wear coefficient $K$   | CNHs concentration  |                     |                     |                     |                     |                     |
|------------------------|---------------------|---------------------|---------------------|---------------------|---------------------|---------------------|
|                        | 0.0% <sub>wt</sub>  | 0.04% <sub>wt</sub> | 0.1% <sub>wt</sub>  | 0.2% <sub>wt</sub>  | 0.5% <sub>wt</sub>  | 1% <sub>wt</sub>    |
| $T=25^{\circ}\text{C}$ | $1.2 \cdot 10^{-4}$ | $5.0 \cdot 10^{-5}$ | $3.8 \cdot 10^{-5}$ | $3.0 \cdot 10^{-5}$ | $6.3 \cdot 10^{-5}$ | $9.0 \cdot 10^{-5}$ |
| $T=70^{\circ}\text{C}$ | $5.1 \cdot 10^{-5}$ | $1.8 \cdot 10^{-5}$ | $1.3 \cdot 10^{-5}$ | $1.7 \cdot 10^{-5}$ | $3.4 \cdot 10^{-5}$ | $5.6 \cdot 10^{-5}$ |

Table S4. Estimated wear coefficients  $K$  as a function of nanoparticles concentration and test temperature.

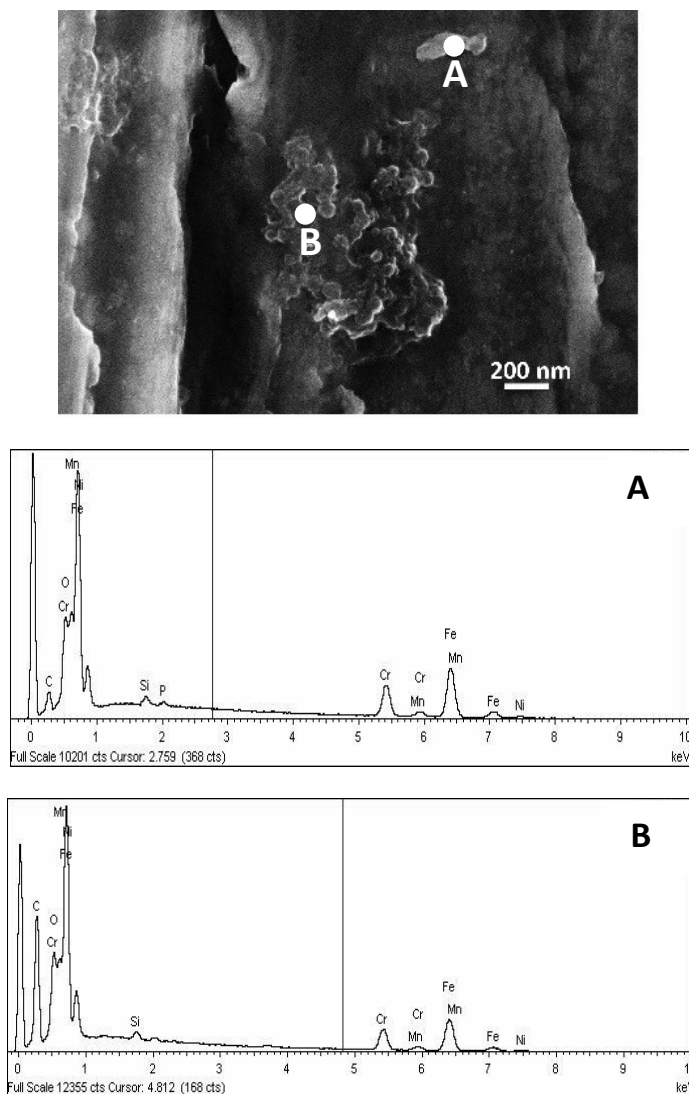

**Figure S5.** X-EDS analyses of wear track surface: dot A in debris where typical signals of steel were detected (Fe, Mn, Cr, Si), dot B in CNHs where the signals due to carbon was higher.
